# Supplementary material for: Phytolith records of flourishing early Holocene Pooideae linked to an 8.2 ka cold event in subtropical China
Source: Oxford University Press journal article supplement (doi:10.1525/elementa.077), 2020-01-01
Supplement: fig._s1.docx [file fig._s1.docx]

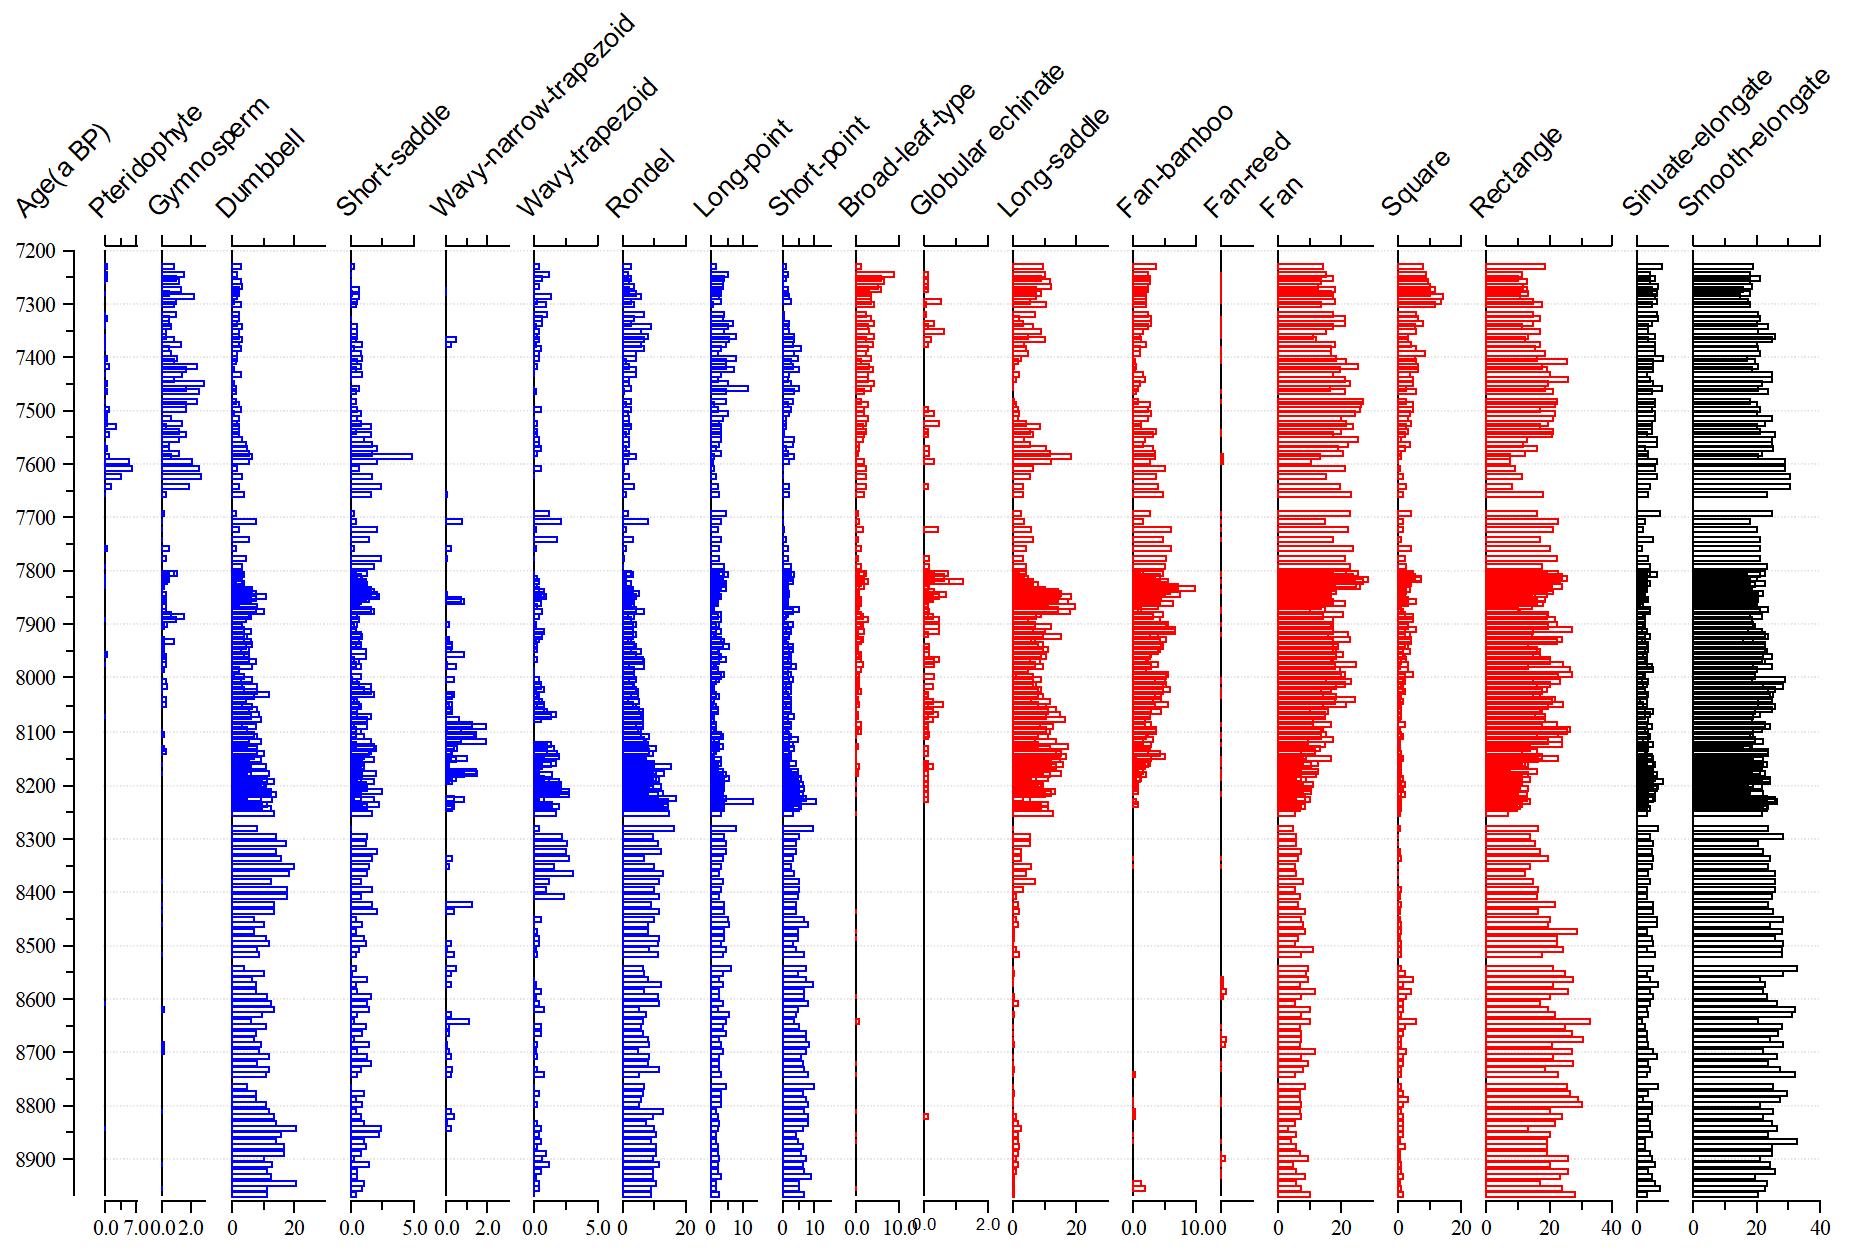


Figure S1 The main phytoliths assemblages from the HG01 core. All phytolith numbers were expressed as percentages of the total phytoliths counted.
