# Supplementary material for: Phytolith records of flourishing early Holocene Pooideae linked to an 8.2 ka cold event in subtropical China
Source: Oxford University Press journal article supplement (doi:10.1525/elementa.077), 2020-01-01
Supplement: supplemental_data.xlsx [file supplemental_data.xlsx]

## Sheet: Sheet1
Depth(cm)	Year(cal.BP)	Wave N Trap	Wave Trap	Trapezoid	Rondel
502	6353.25	1.35371	2.03057	3.38428	6.22271
507	6468.48	0	4.90368	4.90368	7.00525
512	6583.71	0	0.93633	0.93633	2.24719
517	6698.94	0	0.93633	0.93633	2.62172
522	6814.17	0	1.53015	1.53015	4.41044
527	6929.4	0	0.906618	0.906618	3.89846
532	7044.63	0.706714	0.353357	1.06007	4.00471
537	7159.86	0.257069	0.128535	0.385604	5.01285
542	7231.85	0	0.553506	0.553506	3.32103
552	7246.11	0	1.30506	1.30506	1.95759
557	7253.23	0	0.75188	0.75188	3.15789
562	7260.36	0	0	0	2.51046
567	7267.49	0	0.573066	0.573066	4.15473
572	7274.62	0.0780031	0.0780031	0.156006	2.65211
577	7281.74	0.0537057	0.0537057	0.107411	4.83351
582	7288.87	0	1.4652	1.4652	6.22711
587	7296	0	0.421348	0.421348	3.08989
592	7304.11	0	1.03926	1.03926	4.15704
602	7320.34	0	1.15979	1.15979	7.34536
607	7328.45	0	0.727802	0.727802	4.22125
612	7336.56	0	0.75188	0.75188	3.00752
617	7344.67	0	0.270636	0.270636	9.7429
622	7352.78	0	0.525394	0.525394	6.30473
627	7360.89	0	0.342466	0.342466	8.39041
632	7369.01	0.589777	0.589777	1.17955	7.47051
637	7377.12	0.282486	0.282486	0.564972	6.07345
642	7385.23	0	0.718133	0.718133	7.54039
647	7393.34	0	0.537634	0.537634	4.83871
652	7401.45	0	0.509338	0.509338	4.9236
657	7409.56	0	0	0	1.62602
662	7417.68	0	0.438596	0.438596	2.77778
667	7425.79	0	0.19084	0.19084	4.77099
672	7433.9	0	0.171527	0.171527	4.80274
677	7442.01	0	0	0	2.44275
682	7450.12	0	0	0	2.4024
687	7458.23	0	0.188679	0.188679	3.20755
692	7466.35	0	0.312012	0.312012	1.09204
702	7482.57	0	0	0	3.15956
707	7490.68	0	0	0	1.49813
712	7498.79	0	0.706714	0.706714	3.00353
717	7506.9	0	0	0	1.97487
722	7515.02	0	0.179211	0.179211	2.50896
727	7523.13	0	0.368324	0.368324	2.39411
732	7531.24	0	0	0	3.14342
737	7539.35	0	0.358423	0.358423	2.86738
742	7547.46	0	0.343053	0.343053	1.71527
747	7555.57	0	0.56926	0.56926	2.65655
752	7563.69	0	0.56926	0.56926	2.65655
757	7571.8	0	0.595238	0.595238	1.38889
762	7579.91	0	0.37037	0.37037	2.59259
767	7588.02	0	0.172414	0.172414	5
772	7596.13	0	0	0	2.02578
777	7607.73	0	0.610998	0.610998	1.01833
782	7624.57	0	0.188679	0.188679	2.64151
787	7641.4	0	0	0	4.35572
792	7658.23	0.171821	0	0.171821	1.37457
802	7691.9	0	1.34357	1.34357	2.11132
807	7708.73	0.845162	2.25377	3.09893	8.34327
812	7725.57	0	0.325203	0.325203	1.78862
817	7742.4	0	1.95122	1.95122	3.73984
822	7759.23	0.285171	0.285171	0.570342	1.71103
827	7776.07	0.19084	0.19084	0.381679	1.14504
832	7792.9	0	0	0	0.389105
837	7803.91	0	0.183486	0.183486	1.65138
842	7806.19	0	0.19305	0.19305	2.89575
847	7808.46	0	0	0	3.51852
852	7810.74	0	0	0	1.41844
857	7813.02	0	0.336134	0.336134	1.17647
862	7815.29	0	0	0	1.24777
867	7817.57	0	0	0	1.13422
872	7819.85	0	0.516351	0.516351	1.37694
877	7822.12	0	0.533808	0.533808	1.77936
882	7824.4	0	0	0	2.93542
887	7826.67	0	0.18622	0.18622	1.11732
892	7828.95	0	0.371058	0.371058	1.48423
902	7833.5	0	0	0	2.48756
907	7835.78	0	0.534759	0.534759	3.74332
912	7838.06	0	0.915751	0.915751	3.47985
917	7840.33	0	0.892857	0.892857	3.75
922	7842.61	0	0	0	5.78358
927	7844.89	0.188324	0.188324	0.376648	3.76648
932	7847.16	0	0.924214	0.924214	3.51201
937	7849.44	0	1.01695	1.01695	4.74576
942	7851.72	0	0.650407	0.650407	2.11382
947	7853.99	0	0.157978	0.157978	4.10742
952	7856.27	0.770416	0	0.770416	2.7735
957	7858.54	0.92081	0	0.92081	3.49908
962	7862.8	0	0.638978	0.638978	3.35463
967	7867.55	0	0.368324	0.368324	4.23573
972	7872.3	0	0.168634	0.168634	4.89039
977	7877.05	0	0.740741	0.740741	7.59259
982	7881.8	0	0.173913	0.173913	2.26087
987	7886.55	0	0.485437	0.485437	4.36893
992	7891.3	0	0.18315	0.18315	3.2967
1002	7900.8	0.252525	0.252525	0.505051	4.54545
1007	7905.55	0.0914077	0.0914077	0.182815	3.83912
1012	7910.3	0	0.183824	0.183824	3.86029
1017	7915.05	0	0.910747	0.910747	3.82514
1022	7919.8	0	0.788644	0.788644	4.73186
1027	7924.55	0	0.725953	0.725953	3.81125
1032	7929.3	0.259403	0.518807	0.77821	2.14008
1037	7934.05	0.126984	0.253968	0.380952	3.04762
1042	7938.8	0.368324	0.368324	0.736648	4.41989
1047	7943.55	0.373832	0.373832	0.747664	4.6729
1052	7948.3	0.329038	0.438717	0.767754	3.07102
1057	7953.05	0.078064	0.104085	0.182149	6.19308
1062	7957.72	0.94697	0	0.94697	4.92424
1067	7962.36	0	0	0	4.98282
1072	7967.01	0	0.35461	0.35461	6.73759
1077	7971.65	0	0	0	7.33591
1082	7976.29	0.193424	0	0.193424	2.70793
1087	7980.94	0.583658	0	0.583658	7.19844
1092	7985.58	0	0.189753	0.189753	4.17457
1102	7994.87	0	0.173913	0.173913	4
1107	7999.52	0	0.186567	0.186567	4.10448
1112	8004.16	0.487013	0.487013	0.974026	4.54545
1117	8008.81	0.0860585	0.0860585	0.172117	2.58176
1122	8013.45	0	0.63593	0.63593	3.6566
1127	8018.1	0	0.617284	0.617284	4.16667
1132	8022.74	0	0.875657	0.875657	4.72855
1137	8027.39	0	0.288184	0.288184	5.18732
1142	8032.03	0.498575	0.498575	0.997151	5.41311
1147	8036.68	0.368324	0.368324	0.736648	3.31492
1152	8041.32	0	0.531915	0.531915	1.95035
1157	8045.96	0	0.841751	0.841751	5.72391
1162	8050.61	0.434311	0.868621	1.30293	3.58306
1167	8055.25	0.229489	0.458979	0.688468	4.99139
1172	8059.9	0.293624	0.880872	1.1745	5.87248
1177	8064.54	0.415282	1.24585	1.66113	6.97674
1182	8069.19	0	1.80921	1.80921	6.57895
1187	8073.83	0	1.42096	1.42096	6.74956
1192	8078.48	0.717703	0.717703	1.43541	6.85805
1202	8087.77	1.35952	0	1.35952	4.83384
1207	8092.41	1.95489	0	1.95489	6.76692
1212	8097.06	0.173611	0	0.173611	6.59722
1217	8101.7	0.782473	0	0.782473	5.47731
1222	8106.35	1.47601	0	1.47601	6.45756
1227	8110.99	1.38889	0	1.38889	8.85417
1232	8115.63	0.767754	0	0.767754	7.29367
1237	8120.28	1.98675	0	1.98675	8.11258
1242	8124.92	0	1.44404	1.44404	8.66426
1247	8129.57	0	0	0	13.4078
1252	8134.21	0.665188	1.77384	2.43902	11.1498
1257	8138.64	0.427472	1.13993	1.5674	8.93417
1262	8142.76	0.326655	1.95993	2.28659	10.061
1267	8146.87	0.349	2.094	2.443	8.14332
1272	8150.98	1.07335	0	1.07335	6.44007
1277	8155.09	0.188679	0	0.188679	16.4151
1282	8159.2	0.258347	1.80843	2.06677	10.3339
1287	8163.31	0.2	1.4	1.6	10.6667
1292	8167.42	0.235334	0.823668	1.059	15.885
1302	8175.64	1.47444	0.491481	1.96592	11.2713
1307	8179.76	1.6055	0.535168	2.14067	13.6086
1312	8183.87	0.911458	1.5191	2.43056	10.0694
1317	8187.98	0.54789	0.913149	1.46104	11.2013
1322	8192.09	0.266904	1.33452	1.60142	12.0996
1327	8196.2	0.40864	2.0432	2.45184	9.98249
1332	8200.31	0	2.18487	2.18487	9.2437
1337	8204.42	0	2.20339	2.20339	12.5424
1342	8208.53	0	2.27671	2.27671	10.1576
1347	8212.64	0	2.95749	2.95749	8.68762
1352	8216.76	0	0.803213	0.803213	14.0562
1357	8220.87	0	2.92072	2.92072	11.822
1362	8224.98	0.487013	0.487013	0.974026	17.5325
1367	8229.09	0.983607	0.983607	1.96721	10.4918
1372	8233.2	0	0.387597	0.387597	14.9225
1377	8237.31	0	1.6	1.6	14.56
1382	8241.42	0.469641	2.11338	2.58303	14.7601
1387	8245.53	0.357782	1.61002	1.9678	13.059
1392	8253.72	0	0	0	14.5833
1402	8282.31	0	0.540541	0.540541	16.7568
1407	8296.61	0	2.36088	2.36088	10.118
1412	8310.9	0	2.81899	2.81899	11.4243
1417	8325.2	0	2.65487	2.65487	12.5369
1422	8339.49	0.41806	2.92642	3.34448	7.52508
1427	8353.79	0.240806	1.68564	1.92644	10.3327
1432	8368.08	0	3.16901	3.16901	13.0282
1437	8382.38	0	1.26783	1.26783	12.3613
1442	8396.68	0	1.08893	1.08893	10.3448
1447	8410.97	0	2.49554	2.49554	12.1212
1452	8425.27	1.34003	0	1.34003	9.54774
1457	8439.56	0.474684	0	0.474684	12.1835
1462	8453.24	0	0.720721	0.720721	10.2703
1467	8464.45	0	0.169492	0.169492	8.30508
1472	8475.65	0	0.341297	0.341297	8.36177
1477	8486.86	0	0.49505	0.49505	12.3762
1482	8498.06	0.334821	0.558036	0.892857	11.6071
1487	8509.27	0.175507	0.292512	0.468019	9.04836
1492	8520.47	0.436954	0.436954	0.873908	11.6105
1502	8542.88	0.530035	0	0.530035	6.71378
1507	8554.08	0.322061	0	0.322061	7.24638
1512	8565.29	0.0884956	0.0884956	0.176991	8.67257
1517	8576.49	0.317965	0.317965	0.63593	12.8776
1522	8587.7	0	0.678426	0.678426	7.46269
1527	8598.9	0	0.29985	0.29985	11.3943
1532	8610.11	0	0.519931	0.519931	12.1317
1537	8621.31	0	0.982318	0.982318	5.69745
1542	8632.52	0.330033	0	0.330033	8.08581
1547	8643.72	1.18812	0	1.18812	6.93069
1552	8654.93	0.234082	0.702247	0.93633	6.36704
1557	8666.13	0.211149	0.633446	0.844595	7.09459
1562	8677.34	0	0	0	8.67925
1567	8688.54	0.175131	0.350263	0.525394	9.10683
1572	8699.75	0.20979	0.314685	0.524476	5.41958
1577	8710.95	0.294659	0.441989	0.736648	9.02394
1582	8722.16	0	0	0	8.68167
1587	8733.36	0.401284	0.401284	0.802568	11.878
1592	8744.57	0.305944	0.917832	1.22378	5.94406
1602	8766.98	0	0.164204	0.164204	7.55337
1607	8778.18	0	0.588235	0.588235	7.05882
1612	8789.39	0	0.185529	0.185529	6.30798
1617	8800.59	0	0.333333	0.333333	6
1622	8811.8	0.288184	0	0.288184	13.2565
1627	8823	0.441826	0	0.441826	10.162
1632	8834.2	0.178253	0.356506	0.534759	7.66488
1637	8845.41	0.337187	0.674374	1.01156	10.5491
1642	8856.61	0	0.513479	0.513479	11.1682
1647	8867.82	0	0.714286	0.714286	9.28571
1652	8879.02	0	0.394218	0.394218	11.3009
1657	8890.23	0	1.10236	1.10236	11.0236
1662	8901.43	0	0.826446	0.826446	9.91736
1667	8912.64	0	1.31579	1.31579	12.0066
1672	8923.84	0	0.658979	0.658979	9.88468
1677	8935.05	0	0.317965	0.317965	10.0159
1682	8946.25	0	0.486224	0.486224	11.0211
1687	8957.46	0	0.508475	0.508475	9.32203
1692	8968.66	0	0.177936	0.177936	9.4306
